# Supplementary material for: An infant burial from Arma Veirana in northwestern Italy provides insights into funerary practices and female personhood in early Mesolithic Europe
Source: Springer Nature journal article supplement (doi:10.1038/s41598-021-02804-z), 2021-12-14
Supplement: MOESM8 [file 41598_2021_2804_MOESM8_ESM.xlsx]

## Sheet: Human_remains_GIS
Year recovered	# pieces	Plotted Find #	Alt ID#	Human Status	Element	Northing	Easting	Elevation
2017	1	3055		Potential human (not probable)	Fragment	2.6637	1.6504	-0.0913
2017	1	3774		Potential human	Fragment	2.9081	1.516	-0.1787
2017	1	3779		Potential human	Fragment	2.9457	1.539	-0.1894
2017	4	3785		Potential human	Fragments	2.8815	1.6766	-0.1997
2017	1	3786		Potential human	Long bone shaft fragment, likely human	2.8968	1.6514	-0.19555
2017	1	3787		Potential human	Long bone shaft framgent, likely human	2.9318	1.6401	-0.2049
2017	1	3794		Potential human	Tooth	2.8834	1.5567	-0.1933
2017	1	3795	AVH-1i	Human	Right humeral shaft	2.91295	1.6069	-0.19445
2017	1	3800		Potential human	Fragment	2.8834	1.6299	-0.1887
2017	1	3831		Potential human	Fragment	2.8053	1.4996	-0.1502
2017	1	3855		Potential human	Fragment	2.78655	1.56095	-0.2098
2017	3	3859		Human (ZooMS ID)	Cranial fragment	2.9295	1.521	-0.1884
2017	1	5391		Potential human	Rib fragment	2.4719	1.909	-0.04225
2017	4	Sieved find		Potential human (not probable)	Fragment	NA	NA	NA
2017	1	Sieved find		Potential human (not probable)	Sesamoid	NA	NA	NA
2017	1	Sieved find	AVH-1a	Human	Right maxillary lateral incisor	NA	NA	NA
2017	1	Sieved find	AVH-1b	Human	Left mandibular lateral incisor	NA	NA	NA
2017	1	Sieved find	AVH-1c	Human	Left maxillary lateral incisor	NA	NA	NA
2017	1	Sieved find	AVH-1d	Human	Left maxillary central incisor	NA	NA	NA
2017	3	Sieved find		Human	Distal phalanges (n=3)	NA	NA	NA
2017	1	Sieved find		Human	Middle phalanx	NA	NA	NA
2017	5	Sieved find		Human	Metacarpals or proximal phalanges (n=5)	NA	NA	NA
2017	2	Sieved find		Potential human	Long bone shaft fragment	NA	NA	NA
2017	2	Sieved find		Human	Metapodial or phalangeal fragments (n = 2)	NA	NA	NA
2017	5	Sieved find		Potential human	Fragment	NA	NA	NA
2017	1	Sieved find	AVH-1e	Human	Left maxillary first molar (fragment)	NA	NA	NA
2017	1	Sieved find	AVH-1f	Human	Right lateral mandibular incisor	NA	NA	NA
2017	1	Sieved find	AVH-1g	Human	Right maxillary first molar	NA	NA	NA
2017	1	Sieved find	AVH-1h	Human	Left maxillary canine (apical fragment)	NA	NA	NA
2018	1	4326		Human	Cranial fragment	2.895	1.478	-0.1976
2018	1	4327		Human	Fragment	2.9307	1.6037	-0.2003
2018	1	4329		Human	Cranial fragment	2.9066	1.4579	-0.1816
2018	1	4330		Human	Cranial fragment	2.9027	1.46	-0.1818
2018	1	4612		Human	Cranial fragment	2.9506	1.503	-0.1831
2018	1	4618		Human	Cranial fragment	2.9	1.4796	-0.1951
2018	1	4621		Human	Cranial fragment	2.9407	1.5096	-0.1812
2018	1	4627		Human	Fragment	2.836	1.5203	-0.2127
2018	1	4631*		Human	Right frontal bone	2.931	1.5109	-0.1821
2018	1	5033		Human	Vertebra	2.9086	1.5471	-0.2122
2018	1	5046		Human	Fragment	2.9174	1.5862	-0.2163
2018	1	5048		Human	Fragment: refits 5049	2.8899	1.6798	-0.2022
2018	1	5049		Human	Fragment: refits 5048	2.888	1.6839	-0.2058
2018	1	5051		Human	Phalanx	2.8868	1.6195	-0.2096
2018	1	5052		Human	Fragment	2.9192	1.6525	-0.2026
2018	1	5071		Human	Fragment	2.88575	1.63525	-0.21145
2018	1	5083		Human	Fragment	2.9159	1.6302	-0.2118
2018	1	5086		Human	Fragment	2.8879	1.5964	-0.2246
2018	1	5090		Human	Long bone shaft fragment: refits 5397	2.92225	1.64845	-0.1997
2018	1	5357		Human	Vertebral fragment?	2.4459	1.9106	-0.028
2018	1	5395		Human	Metacarpal or metatarsal	2.90505	1.6716	-0.2147
2018	1	5396		Human	Long bone shaft fragment	2.93105	1.6184	-0.2019
2018	1	5397		Human	Long bone shaft fragment: refits 5090	2.92205	1.62805	-0.20655
2018	1	5398		Human	Fragment	2.9208	1.6307	-0.2159
2018	1	5400		Human	Long bone shaft fragment	2.92305	1.5961	-0.2119
2018	1	5403		Human	Long bone shaft fragment	2.93555	1.6132	-0.20875
2018	1	5405		Human	Fragment	2.8775	1.6638	-0.2162
2018	1	6267		Human	Cranial fragment	2.8266	1.435	-0.204
2018	1	6270		Human	Rib fragment	2.8967	1.5272	-0.22965
2018	1	6272		Human	Rib fragment	2.8295	1.557	-0.2275
2018	1	6273		Human	Mandible (left corpus)	2.83145	1.527	-0.2158
2018	1	6275		Human	Cranial fragment	2.8064	1.4991	-0.199
2018	1	6279		Human	Rib fragment	2.8502	1.5676	-0.2357
2018	1	6280		Human	Rib fragment	2.8558	1.56465	-0.2355
2018	1	6281		Human	Rib fragment	2.88	1.52525	-0.23
2018	1	6284		Human	Fragment	2.86	1.5368	-0.2332
2018	1	6285		Human	Rib fragment	2.8628	1.52235	-0.23255
2018	1	6287		Human	Fragment	2.8472	1.5198	-0.2274
2018	1	6288		Human	Left pars lateralis of occipital bone	2.8365	1.53495	-0.22445
2018	1	6289		Human	Vertebral arch fragment	2.833	1.5331	-0.22245
2018	1	6290		Human	Rib fragment	2.83935	1.55985	-0.2357
2018	1	6291		Human	Fragment	2.8429	1.5481	-0.232
2018	1	6292		Human	Rib fragment	2.8341	1.55885	-0.23405
2018	1	6293		Human	Rib fragment	2.8138	1.5671	-0.22935
2018	1	6294		Human	Rib fragment	2.8133	1.55835	-0.2264
2018	1	6295		Human	Rib fragment	2.8119	1.5467	-0.225
2018	1	6296		Human	Rib fragment	2.81255	1.5375	-0.22005
2018	1	6298		Human	Fragment	2.84395	1.54645	-0.2382
2018	1	6299		Human	Fragment	2.8291	1.5493	-0.228
2018	1	6300		Human	Rib fragment	2.8202	1.5519	-0.22685
2018	1	6302		Human	Rib fragment	2.8165	1.538	-0.22305
2018	1	6303		Human	Fragment	2.8244	1.5488	-0.2304
2018	1	6304		Human	Rib fragment	2.8146	1.54175	-0.22405
2018	1	6949		Human	Long bone shaft fragment (lower limb)	2.9703	1.669	-0.23185
2018	1	6950		Human	Long bone shaft fragment (lower limb)	2.86955	1.6223	-0.22655
2018	1	6953		Human	Rib fragment	2.8142	1.5609	-0.2264
2018	1	6956		Human	Fragment	2.8163	1.5932	-0.2352
2018	1	6969*		Human	Left frontal bone	2.8937	1.4524	-0.1787
2018	1	6973		Human	Rib fragment	2.8504	1.6114	-0.2388
2018	1	6978		Potential human	Fragment	3.0321	1.4639	-0.2421
2018	1	7502		Human	Cranial fragment	2.8872	1.4324	-0.1581
2018	1	7503		Human	Cranial fragment	2.8904	1.4681	-0.1815
2018	1	7504		Human	Cranial fragment	2.8929	1.4674	-0.1917
2018	1	7505		Human	Cranial fragment	2.8969	1.4651	-0.1946
2018	1	7532		Human	Fragment	2.83545	1.36915	-0.1374
2018	1	7548		Human	Cranial fragment	2.8043	1.4524	-0.1671
2018	1	7549		Human	Cranial fragment	2.8228	1.4367	-0.182
2018	1	7551		Human	Fragment	2.7848	1.4998	-0.1881
2018	1	7552		Human	Fragment	2.774	1.4977	-0.194
2018	1	7553		Human	Fragment	2.8061	1.5085	-0.1867
2018	1	7554		Human	Cranial fragment	2.7964	1.4954	-0.1856
2018	1	7557		Human	Fragment	2.7941	1.4973	-0.1899
2018	1	7559		Human	Fragment	2.8017	1.4557	-0.1788
2018	1	7568		Human	Fragment	2.8451	1.5383	-0.22035
2018	1	7569		Human	Fragment	2.8483	1.5355	-0.2198
2018	1	7571		Human	Fragment	2.8205	1.4726	-0.1978
2018	1	7574		Human	Cranial fragment	2.8589	1.4883	-0.2172
2018	1	7578		Human	Cranial fragment	2.795	1.48	-0.195
2018	1	9127		Human	Fragment	2.7947	1.4996	-0.2059
2018	1	9128		Human	Vertebral arch fragment	2.7993	1.4981	-0.2289
2018	1	9129		Human	Vertebra	2.8058	1.503	-0.2344
2018	1	9130		Human	Vertebral fragment	2.817	1.49795	-0.2297
2018	1	9131*		Human	Cranial vault and base (partial)	2.8505	1.4583	-0.1707
2018	1	9132		Human	Vertebral arch fragment	NA	NA	NA
2018	1	9205		Human	Rib fragment	2.788	1.5155	-0.205
2018	1	9206		Human	Rib fragment	2.83	1.55515	-0.2363
2018	1	9207		Human	Rib fragment	2.82355	1.5446	-0.22785
2018	1	9208		Human	Rib fragment	2.82025	1.55895	-0.23725
2018	1	9209		Human	Fragment	2.8379	1.5414	-0.2331
2018	1	9210		Human	Rib fragment	2.8243	1.55085	-0.2363
2018	1	9211		Human	Rib fragment	2.82015	1.55015	-0.23425
2018	1	9212		Human	Rib fragment	2.8216	1.54125	-0.23325
2018	1	9213		Human	Rib fragment	2.81615	1.5413	-0.23045
2018	1	9214		Human	Fragment	2.8209	1.5227	-0.2236
2018	1	9215		Human	Vertebral arch fragment	2.8289	1.523	-0.2238
2018	1	9216		Human	Vertebral arch fragment	2.8301	1.5356	-0.2379
2018	1	9217		Human	Vertebral arch fragment	2.8169	1.5293	-0.2261
2018	1	9218		Human	Vertebral arch fragment	2.8248	1.52985	-0.2304
2018	1	9219		Human	Vertebral arch fragment	2.8298	1.53325	-0.23525
2018	1	9220		Human	Vertebral centrum	2.8345	1.5302	-0.2274
2018	1	9221		Human	Vertebral arch fragment	2.8384	1.5232	-0.232
2018	1	9222		Human	Vertebral fragment	2.8354	1.5186	-0.2294
2018	1	9223		Human	Vertebral arch fragment	2.8342	1.5132	-0.2248
2018	1	9224		Human	Vertebral arch fragment	2.8286	1.5104	-0.2224
2018	1	9225		Human	Cranial fragment	2.8066	1.5405	-0.2276
2018	1	9226		Human	Vertebral arch fragment	2.8247	1.5084	-0.2241
2018	1	9229		Human	Cranial fragment	2.7852	1.4927	-0.1978
2018	1	9236		Human	Vertebral fragment	2.8162	1.5238	-0.2287
2018	1	9237		Human	Vertebral fragment	2.8128	1.5204	-0.2274
2018	1	9238		Human	Vertebral arch fragment	2.8207	1.5122	-0.2244
2018	1	9239		Human	Vertebral arch fragment	2.8101	1.5185	-0.2256
2018	1	9240		Human	Vertebral arch fragment	2.8065	1.5184	-0.2202
2018	1	9241		Human	Right pars lateralis of occipital bone	2.82275	1.51165	-0.21525
2018	1	9242		Human	Vertebral arch fragment	2.8202	1.5034	-0.2172
2018	1	9243		Human	Left mandibular first molar	2.7935	1.5136	-0.2066
2018	1	9244		Human	Cranial fragment	2.7909	1.4869	-0.2047
2018	1	9245		Human	Right scapula and nonidentifiable fragments	2.8003	1.5276	-0.22575
2018	1	9247		Human	Vertebral arch fragment	2.8188	1.5057	-0.2294
2018	1	9248		Human	Fragment	2.78755	1.5191	-0.2309
2018	1	9249		Human	Fragment	2.8105	1.5055	-0.2205
		* coordinates represent the central point of multiple points taken.
