# Supplementary material for: An infant burial from Arma Veirana in northwestern Italy provides insights into funerary practices and female personhood in early Mesolithic Europe
Source: Springer Nature journal article supplement (doi:10.1038/s41598-021-02804-z), 2021-12-14
Supplement: MOESM9 [file 41598_2021_2804_MOESM9_ESM.xlsx]

## Sheet: Sheet1
PF#	Lot#	Easting	Northing	Elevation	Location	Taxon	Length mm	Width mm	Perf length mm
3484	125	1.6393	2.8546	-0.1421	Sediment	Glycymeris	31.44	19.908	5.147
3854	140	1.5337	2.7981	-0.20465	Right arm	Glycymeris	34.2358	23.6929	3.49832
3858	140	1.53735	2.83015	-0.2143	Torso	Glycymeris	29.8272	22.8415	3.77882
9228	184	1.50295	2.78345	-0.21105	Head right	Glycymeris	37.8265	26.3232	3.98959
Sieved	104	N/A	N/A	N/A	Washed away	Columbella rustica	12.8914	7.2979	5.108
Sieved	112	N/A	N/A	N/A	Washed away	Columbella rustica	14.908	8.2489	4.202
Sieved	112	N/A	N/A	N/A	Washed away	Columbella rustica	12.3241	7.5698	4.234
2910	120	1.6312	2.9267	-0.1224	Sediment	Columbella rustica	14.3576	9.28456	5.00384
2926	120	1.5718	2.9547	-0.124	Sediment	Turritella sp.	17.651	9.533	4.973
2915	120	1.7666	2.8621	-0.0989	Sediment	Columbella rustica	15.6154	9.321	5.164
2916	120	1.763	2.8839	-0.1061	Sediment	Columbella rustica	15.5771	9.447	4.9832
Sieved	120	N/A	N/A	N/A	Sediment	Columbella rustica	13.8546	7.248	9.494
Sieved	120	N/A	N/A	N/A	Sediment	Columbella rustica	14.2408	8.9207	6.7131
Sieved	120	N/A	N/A	N/A	Sediment	Columbella rustica	11.9803	8.47696	4.7371
3486	125	1.6721	2.8223	-0.1367	Sediment	Columbella rustica	13.5654	7.63616	4.1667
3494	125	1.6575	2.8838	-0.1507	Sediment	Columbella rustica	13.997	8.551	5.9121
3578	125	1.6759	2.8809	-0.1596	Sediment	Columbella rustica	15.2933	9.48564	5.87786
3575	125	1.5319	2.8387	-0.1558	Sediment	Columbella rustica	13.6491	8.44958	6.0719
3381	125	1.7352	2.858	-0.1235	Sediment	Columbella rustica	15.353	8.8813	5.941
3777	137	1.5223	2.9114	-0.1892	Left arm	Columbella rustica	14.8385	9.16112	5.9202
3775	137	1.5446	2.9519	-0.1938	Left arm	Columbella rustica	16.2759	9.0067	6.4933
3856	140	1.54975	2.823	-0.2163	Torso	Columbella rustica	11.0444	9.10372	5.496
3834	140	1.67625	2.87775	-0.1998	Feet	Columbella rustica	14.653	8.41	5.32
3847	140	1.5792	2.79145	-0.207	Right arm	Columbella rustica	13.9629	7.99498	4.32168
3848	140	1.5756	2.7949	-0.2137	Right arm	Columbella rustica	15.929	9.41719	5.58604
3851	140	1.56115	2.78055	-0.20145	Right arm	Columbella rustica	14.0736	8.16142	4.49668
3853	140	1.5558	2.7833	-0.2041	Right arm	Columbella rustica	13.8769	7.81902	4.11648
3849	140	1.5661	2.78475	-0.20155	Right arm	Columbella rustica	15.3316	8.75417	4.8792
3839	140	1.673	2.8636	-0.2067	Feet	Columbella rustica	13.1176	7.74014	4.43088
3846	140	1.57295	2.7884	-0.2043	Right arm	Columbella rustica	15.2868	8.7669	5.67372
3838	140	1.66905	2.87015	-0.20015	Feet	Columbella rustica	14.1548	7.56802	8.1958
3840	140	1.66795	2.8737	-0.204	Feet	Columbella rustica	14.3774	8.64282	4.53622
3835	140	1.67215	2.8554	-0.2003	Feet	Columbella rustica	12.8681	7.7321	4.76179
3833	140	1.6789	2.86165	-0.20075	Feet	Columbella rustica	13.4121	7.16974	4.54198
3836	140	1.68255	2.86625	-0.20625	Feet	Columbella rustica	12.6718	8.24944	3.81291
5062	154	1.6067	2.88885	-0.2137	Abdomen	Columbella rustica	13.8008	7.9666	5.17233
5064	154	1.6158	2.87185	-0.215	Abdomen	Columbella rustica	15.2941	8.9325	6.31377
5063	154	1.61415	2.893	-0.2119	Abdomen	Columbella rustica	13.694	8.21515	4.2102
5060	154	1.61065	2.87685	-0.2138	Abdomen	Columbella rustica	13.1864	8.04862	5.34839
4628	191	1.57115	2.9243	-0.20195	Sediment	Columbella rustica	14.1159	8.64471	5.57308
4324	191	1.5154	2.9184	-0.2053	Left arm	Columbella rustica	13.3625	9.39314	6.49198
4440	184	1.49575	2.8885	-0.1626	Sediment	Columbella rustica	13.5762	7.84162	4.67363
9227	184	1.44415	2.7939	-0.2236	Head right	Columbella rustica	12.9858	7.92301	4.96541
7536	184	1.4909	2.7998	-0.1406	Sediment	Columbella rustica	14.3187	8.96947	6.01545
7538	184	1.49605	2.8391	-0.16295	Sediment	Columbella rustica	13.7195	8.37671	4.53665
7556	184	1.51735	2.80455	-0.19435	Head right	Columbella rustica	14.4571	9.04819	5.27497
6263	184	1.506	2.7778	-0.2004	Head right	Columbella rustica	14.2212	8.47595	4.91132
6268	184	1.4532	2.7941	-0.20335	Head right	Columbella rustica	14.8376	9.17588	4.97327
7558	184	1.49055	2.78325	-0.1895	Head right	Columbella rustica	15.2906	8.85929	6.07824
6260	184	1.51555	2.7841	-0.2007	Head right	Columbella rustica	13.3192	8.98614	4.74498
6261	184	1.48	2.78505	-0.19485	Head right	Columbella rustica	13.8072	8.23964	4.68945
7580	184	1.4699	2.7965	-0.1966	Head right	Columbella rustica	16.3068	9.42716	6.54246
6262	184	1.45085	2.7917	-0.1967	Head right	Columbella rustica	14.9944	9.28798	5.5793
7577	184	1.48465	2.7938	-0.1926	Head right	Columbella rustica	14.3211	8.53763	5.4919
7575	184	1.4636	2.85485	-0.19265	Inside cranium	Columbella rustica	17.0918	9.41814	5.40797
7579	184	1.4573	2.79575	-0.19365	Head right	Columbella rustica	14.3462	9.87081	5.64923
7550	184	1.5122	2.79535	-0.1925	Head right	Columbella rustica	13.9308	8.60808	4.93759
6286	184	1.4923	2.8989	-0.2151	Head left	Columbella rustica	13.8659	8.35661	4.85813
6301	200	1.61565	2.8726	-0.249	Sediment	Columbella rustica	13.0036	7.48687	4.46292
9246	184	1.50175	2.8316	-0.2224	Under cranium	Columbella rustica	15.267	8.47845	4.9956
6274	184	1.5085	2.84375	-0.2143	Torso	Columbella rustica	14.8268	8.9784	6.2589
6271	184	1.52285	2.90715	-0.23145	Left arm	Columbella rustica	15.0076	9.18482	5.93007
6965	200	1.65125	2.9412	-0.24775	Washed away	Columbella rustica	12.8275	7.6656	4.14185
6915	200	1.6089	2.9024	-0.2197	Abdomen	Columbella rustica	13.987	7.58006	4.15785
6917	200	1.6001	2.9167	-0.2163	Abdomen	Columbella rustica	13.0578	7.50899	4.07705
6914	200	1.6133	2.89765	-0.2155	Abdomen	Columbella rustica	15.4192	8.77873	5.14829
6921	200	1.5909	2.92235	-0.22365	Abdomen	Columbella rustica	14.05	8.20794	4.8842
6943	200	1.60085	2.8704	-0.22525	Abdomen	Columbella rustica	13.7692	8.62852	4.2851
6938	200	1.59485	2.91045	-0.2247	Abdomen	Columbella rustica	15.717	9.0557	4.93658
6920	200	1.6098	2.8714	-0.22125	Abdomen	Columbella rustica	12.7988	7.55946	4.19681
6947	200	1.58945	2.8707	-0.2298	Abdomen	Columbella rustica	14.5122	8.4598	4.81647
6940	200	1.59595	2.90275	-0.2257	Abdomen	Columbella rustica	14.7163	8.33576	5.07577
6964	200	1.65805	2.975	-0.24785	Washed away	Columbella rustica	13.0444	8.02019	4.52788
6913	200	1.63115	2.88295	-0.2168	Near abdomen	Columbella rustica	12.5575	8.00533	4.00642
6967	200	1.62975	2.93115	-0.25045	Washed away	Columbella rustica	13.1623	7.91969	6.22071
5088	200	1.59805	2.87605	-0.22195	Pelvis	Columbella rustica	14.2994	8.90177	5.31201
6942	200	1.60205	2.8846	-0.22655	Pelvis	Columbella rustica	13.8987	7.69909	5.95436
6916	200	1.60605	2.9101	-0.2175	Pelvis	Columbella rustica	16.3857	9.51762	4.67713
6976	200	1.6954	2.9897	-0.25285	Washed away	Columbella rustica	12.9947	7.34331	4.33027
6939	200	1.58745	2.9073	-0.22745	Abdomen	Columbella rustica	12.2638	7.95234	5.04041
6963	200	1.65725	3.0145	-0.2532	Washed away	Columbella rustica	14.1871	7.99039	4.8906
6946	200	1.54235	2.8454	-0.21725	Torso	Columbella rustica	14.4523	8.83262	4.89561
6952	200	1.65125	2.8917	-0.2298	Washed away	Columbella rustica	13.1039	8.19603	4.62021
5089	200	1.6013	2.89625	-0.21895	Abdomen	Columbella rustica	13.9607	8.65902	4.41169
6966	200	1.67845	2.9186	-0.2424	Washed away	Columbella rustica	14.6564	8.55847	5.41764
6941	200	1.6021	2.894	-0.22575	Abdomen	Columbella rustica	13.2836	7.85904	4.51661
6918	200	1.60385	2.8607	-0.2189	Abdomen	Columbella rustica	13.4631	7.95787	5.12715
6919	200	1.59095	2.86495	-0.2226	Abdomen	Columbella rustica	12.9707	7.49398	3.88159
6977	200	1.5696	2.9057	-0.2325	Near abdomen	Columbella rustica	12.6797	7.93029	3.98306
6922	200	1.5158	2.8948	-0.21765	Neck left	Columbella rustica	11.5497	8.82324	5.62164
6951	200	1.6726	2.8737	-0.22365	Under feet	Columbella rustica	12.9562	7.59183	4.04229
3843	140	1.54135	2.79115	-0.1969	Right arm	Columbella rustica	N/A	N/A	N/A
5061	154	1.6127	2.88425	-0.21165	Abdomen	Columbella rustica	N/A	N/A	N/A
3852	140	1.54635	2.78105	-0.20195	Right arm	Columbella rustica	N/A	N/A	N/A
3077	125	1.6244	2.8609	-0.1337	Sediment	Columbella rustica	N/A	N/A	N/A
Still under cranium	N/A	N/A	N/A	N/A	Under cranium	Columbella rustica	N/A	N/A	N/A
Still under cranium	N/A	N/A	N/A	N/A	Under cranium	Columbella rustica	N/A	N/A	N/A
Still under cranium	N/A	N/A	N/A	N/A	Under cranium	Columbella rustica	N/A	N/A	N/A
